# Supplementary material
Source: PubMed Central journal article supplement (PMC10159957)
Supplement: NIHMS1884010-supplement-1.pdf [file NIHMS1884010-supplement-1.pdf]

Supplemental Table 1. Statistical test results between images in the pass and rework pathways for scanner and demographic information.

|                                | <b>Test<br/>Statistic</b> | <b>Degrees<br/>of<br/>Freedom<sup>a</sup></b> | <b>P-<br/>Value</b> |
|--------------------------------|---------------------------|-----------------------------------------------|---------------------|
| <b>Scanner Information</b>     |                           |                                               |                     |
| Manufacturer                   | 1.675                     | 1                                             | .20                 |
| Model                          | 8.073                     | 8                                             | .43                 |
| Field Strength                 | 0.031                     | 1                                             | .86                 |
| Slice Thickness – mm           | 0.000                     | 1                                             | <i>P</i> >.99       |
| Pixel Spacing                  | 0.156                     | 86,84                                         | .25                 |
| <b>Demographic Information</b> |                           |                                               |                     |
| Sex                            | 4.596                     | 1                                             | .03                 |
| Age – yr                       | 0.155                     | 86,84                                         | .26                 |
| BMI                            | 0.205                     | 85,84                                         | .06                 |
| Race                           | 2.517                     | 4                                             | .64                 |

<sup>a</sup> A single degree of freedom indicates a chi-squared test of independence was performed while a pair of degrees of freedom indicates a two-sample Kolmogorov–Smirnov test was performed.

Supplemental Table 2. Additional statistical test results between images in the pass and rework pathways for additional scanner/image acquisition variables.<sup>a</sup>

|                                 | <b>Pass<br/>(N=86)</b> | <b>Rework<br/>(N=84)</b> | <b>Test<br/>Statistic</b> | <b>Degrees<br/>of<br/>Freedom<sup>b</sup></b> | <b>P-<br/>Value</b> |
|---------------------------------|------------------------|--------------------------|---------------------------|-----------------------------------------------|---------------------|
| Repetition Time – ms            | 1071.7±204             | 1063.9±220.9             | 0.074                     | 86,84                                         | .97                 |
| Echo Time – ms                  | 88.2±4.6               | 88.9±6.1                 | 0.135                     | 86,84                                         | .42                 |
| Echo Train Length               | 47.9±53.3              | 34.8±48.5                | 0.160                     | 86,84                                         | .23                 |
| Flip Angle                      | 114.1±30.4             | 106.3±28.2               | 0.157                     | 86,84                                         | .24                 |
| Percent Sampling – %            | 64.9±10.3              | 62±9.5                   | 0.184                     | 86,84                                         | .11                 |
| Rows                            | 447.3±75.7             | 464.8±68.9               | 0.109                     | 86,84                                         | .70                 |
| Columns                         | 447±76                 | 461.8±74.4               | 0.109                     | 86,84                                         | .70                 |
| Pixel Bandwidth                 | 458.8±196.2            | 412.6±183.9              | 0.124                     | 86,84                                         | .53                 |
| Number of Images in Acquisition | 47.2±10.7              | 47.1±11.4                | 0.087                     | 49,56                                         | .99                 |
| Field of View                   | 433.9±25.8             | 434.5±27.9               | 0.087                     | 49,56                                         | .99                 |
| Patient Position – no. (%)      |                        |                          | 1.304                     | 1                                             | .25                 |
| Feet First-Supine               | 49 (57)                | 56 (66.7)                |                           |                                               |                     |
| Head First-Supine               | 37 (43)                | 28 (33.3)                |                           |                                               |                     |

<sup>a</sup> Plus-minus values are means±SD <sup>b</sup> A single degree of freedom indicates a chi-squared test of independence was performed while a pair of degrees of freedom indicates a two-sample Kolmogorov–Smirnov test was performed.

Supplemental Table 3. Statistical test results between images in the pass and rework pathways for measures of disease severity.<sup>a</sup>

|                                    | <b>Pass<br/>(N=86)</b> | <b>Rework<br/>(N=84)</b> | <b>Test<br/>Statistic</b> | <b>Degrees<br/>of<br/>Freedom<sup>b</sup></b> | <b>P-<br/>Value</b> |
|------------------------------------|------------------------|--------------------------|---------------------------|-----------------------------------------------|---------------------|
| Algorithm TKV – cc                 | 1548±1225.3            | 1649.1±1640.5            | 0.160                     | 86,83                                         | .23                 |
| eGFR – mL/min/BSA                  | 61.2±27.2              | 60.1±26.9                | 0.101                     | 73,68                                         | .87                 |
| Creatinine – mg/dL                 | 1.4±0.7                | 1.5±1                    | 0.127                     | 79,77                                         | .56                 |
| BUN – mg/dL                        | 21.1±9.8               | 21.5±11.7                | 0.105                     | 76,73                                         | .81                 |
| Albumin/Creatinine Ratio<br>– mg/g | 140.2±291.4            | 48.9±74.1                | 0.276                     | 20,19                                         | .45                 |

<sup>a</sup> Plus-minus values are means±SD <sup>b</sup> A single degree of freedom indicates a chi-squared test of independence was performed while a pair of degrees of freedom indicates a two-sample Kolmogorov–Smirnov test was performed.

A

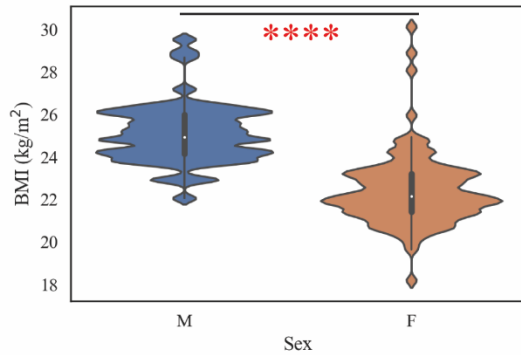

B

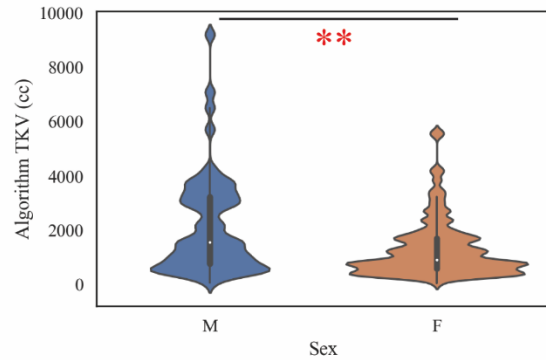

C

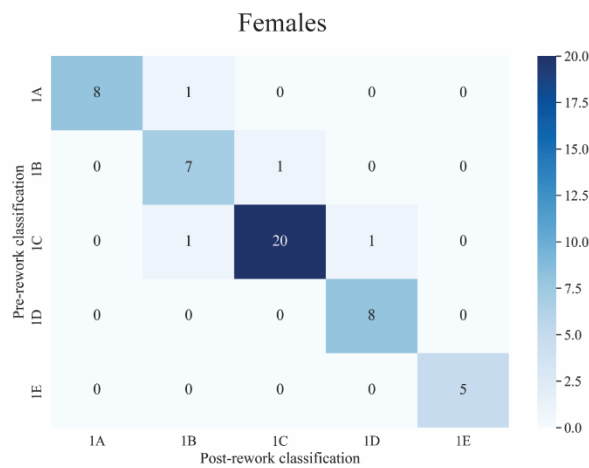

D

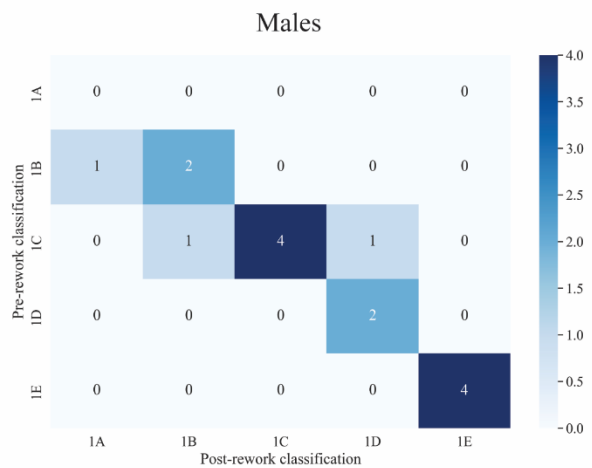

**Supplemental Figure 1. Agreement between AI and corrected AI typical ADPKD classification by gender.** Panel A shows female BMI ( $\text{kg}/\text{m}^2$ ) is significantly lower on average than male BMI across all cases (KS Test,  $\text{stat}=0.78$ ,  $P=1.8e^{-23}$ ). Panel B shows female total kidney volume (cc) is significantly smaller on average than male total kidney volume across all cases (KS Test,  $\text{stat}=0.26$ ,  $P=0.008$ ). \*\* =  $P<0.01$ ; \*\*\*\* =  $P<0.0001$ . Typical ADPKD classification ranges from 1A (least severe) to 1E (most severe). Panel C represents agreement heatmap between AI and corrected AI typical ADPKD classification for females in rework only cases (weighted Cohen's kappa= 0.90). Panel D represents agreement heatmap between AI and corrected AI typical ADPKD classification for males in rework only cases (weighted Cohen's kappa= 0.74). Diagonal represents perfect agreement. The darker the shade of blue represents greater counts.
